# Supplementary material for: Revealing joint evolutions and causal interactions in complex eco-hydrological systems by a network-based framework
Source: Copernicus journal article supplement (doi:10.5194/hess-2024-226), 2024-07-31
Supplement: Supplementary file 1 [file hess-2024-226-supplement.pdf]

Supplementary Material for

**Revealing joint evolutions and causal interactions in complex eco-hydrological systems by a network-based framework**

Lu Wang<sup>1</sup>, Yue-Ping Xu<sup>1\*</sup>, Haiting Gu<sup>1</sup>, Li Liu<sup>1</sup>, Xiao Liang<sup>1</sup>, Siwei Chen<sup>1</sup>

<sup>1</sup> Institute of Water Science and Engineering, Zhejiang University, Hangzhou, 310058, China

\* Correspondence to: [yuepingxu@zju.edu.cn](mailto:yuepingxu@zju.edu.cn)

## S1 Introduction of Mann-Kendall test

The Mann-Kendall (MK) test searches for a trend in a series without specifying whether the trend is linear or nonlinear. Given a series  $x(t)$  with the length of  $n$ , the null hypothesis of no trend assumes that the series  $x(t)$  is independently distributed. The MK test is based on the test statistic  $S$ :

$$S = \sum_{i=1}^{n-1} \sum_{j=i+1}^n \text{sgn}(x(j) - x(i)) \quad (\text{Eq. S1.1})$$

with

$$\begin{cases} \text{sgn}(x) = 1 & \text{if } x > 0 \\ \text{sgn}(0) = 0 \\ \text{sgn}(x) = -1 & \text{if } x < 0 \end{cases} \quad (\text{Eq. S1.2})$$

A positive (negative) value of  $S$  indicates an upward (downward) trend. It is found that the statistic  $S$  is approximately normally distributed when  $n > 8$ . The standardized test statistic  $Z$  follows the standard normal distribution:

$$Z = \begin{cases} (S - 1) / \sqrt{\text{Var}(S)} & \text{if } S > 0 \\ \text{sgn}(0) = 0 \\ (S + 1) / \sqrt{\text{Var}(S)} & \text{if } S < 0 \end{cases} \quad (\text{Eq. S1.3})$$

The null hypothesis of no trend is rejected if the absolute value of  $Z$  is bigger than the theoretical value  $Z_{1-\alpha/2}$ , where  $\alpha$  is the statistical significance level concerned.

## S2 Datasets

**Table S1.** Brief description of datasets used in the study

| Type                                 | Abbreviation    | Variables                              | Data sources                                 | Temporal resolution | Unit                           |
|--------------------------------------|-----------------|----------------------------------------|----------------------------------------------|---------------------|--------------------------------|
| Hydrological variables               | R               | Runoff                                 | National Hydrological Yearbook               | Monthly             | m <sup>3</sup> /s              |
|                                      | SL              | Sediment load                          |                                              |                     | kg/s                           |
|                                      | SMSA            | Soil moisture storage anomaly          | GLDAS-v2.1-Noah                              | Monthly             | mm                             |
|                                      | SWSA            | Surface water storage anomaly          | GLDAS-v2.1-Noah                              | Monthly             | mm                             |
|                                      | TWSA            | Terrestrial water storage anomaly      | GRACE/GRACR-FO CSR                           | Monthly             | mm                             |
|                                      |                 |                                        | GRACE/GRACR-FO GSFC                          |                     | mm                             |
|                                      |                 |                                        | GRACE/GRACR-FO JPL                           |                     | mm                             |
| SCA                                  | Snow cover area | MODIS-based snow cover product         | Monthly                                      | km <sup>2</sup>     |                                |
| Ecological variables                 | NDVI            | Normalized difference vegetation index | MOD13A3.061                                  | Monthly             | /                              |
|                                      | GPP             | Gross primary productivity             | MOD17A2H.061                                 | Monthly             | gC m <sup>-2</sup>             |
|                                      | WUE             | Ecosystem water use efficiency         | MOD17A2H.061<br>MOD16A2.061                  | Monthly             | C/kg H <sub>2</sub> O          |
| Meteorological data (Auxiliary data) | P               | Precipitation                          | China Meteorological Administration          | Monthly             | mm                             |
|                                      | T               | Temperature                            |                                              | Monthly             | °C                             |
| Human activity (Auxiliary data)      | RSC             | Reservoir storage change               | National Hydrological Yearbook               | Monthly             | 10 <sup>8</sup> m <sup>3</sup> |
|                                      | WW              | Water withdrawals                      | Water Resources Bulletin of the Yellow River | Annual              | m <sup>3</sup>                 |

### S3 Multi-year mean values of ecohydrological variables

**Table S2.** Multi-year mean values of eco-hydrological variables (in the growing season)

| Variables   | R <sub>modulus</sub>                             | TWSA                                | SMSA            | GWSA    | NDVI | GPP                |
|-------------|--------------------------------------------------|-------------------------------------|-----------------|---------|------|--------------------|
| Units       | ×10 <sup>3</sup> m <sup>3</sup> /km <sup>2</sup> | mm                                  | mm              | mm      | /    | g*C/m <sup>2</sup> |
| Region I    | 84.98                                            | 5.15                                | 12.87           | -7.84   | 0.45 | 339.95             |
| Region II   | 84.39                                            | -1.65                               | 4.28            | -5.58   | 0.49 | 476.17             |
| Region III  | -57.36                                           | -22.18                              | 2.88            | -24.79  | 0.27 | 260.19             |
| Region IV   | -                                                | -31.56                              | 4.39            | -35.71  | 0.22 | 219.51             |
| Region V    | 10.47                                            | -49.90                              | 4.32            | -52.96  | 0.41 | 419.59             |
| Region VI   | 13.64                                            | -42.48                              | -8.08           | -32.85  | 0.55 | 632.47             |
| Region VII  | 81.19                                            | -99.62                              | -11.70          | -83.28  | 0.65 | 731.21             |
| Region VIII | -217.58                                          | -152.81                             | -34.91          | -117.67 | 0.59 | 623.75             |
| Variables   | WUE                                              | SL <sub>modulus</sub>               | SCA             | P       | T    | ET                 |
| Units       | C/kg H <sub>2</sub> O                            | ×10 <sup>3</sup> kg/km <sup>2</sup> | km <sup>2</sup> | mm      | °C   | mm                 |
| Region I    | 0.98                                             | 66.94                               | 7900            | 449.64  | 7.3  | 346.2              |
| Region II   | 1.57                                             | 21.09                               |                 | 400.74  | 11.7 | 302.59             |
| Region III  | 1.86                                             | 105.42                              |                 | 229.08  | 18.3 | 139.80             |
| Region IV   | 2.02                                             | -                                   |                 | 276.84  | 18.4 | 108.54             |
| Region V    | 2.14                                             | 601.29                              |                 | 407.88  | 18.8 | 194.82             |
| Region VI   | 1.98                                             | 741.25                              |                 | 442.92  | 19.3 | 318.96             |
| Region VII  | 2.05                                             | -3778.52                            |                 | 521.22  | 21.4 | 356.61             |
| Region VIII | 1.75                                             | 2307.59                             |                 | 930.18  | 20.0 | 356.29             |

## S4 Evolution trend of snow cover area

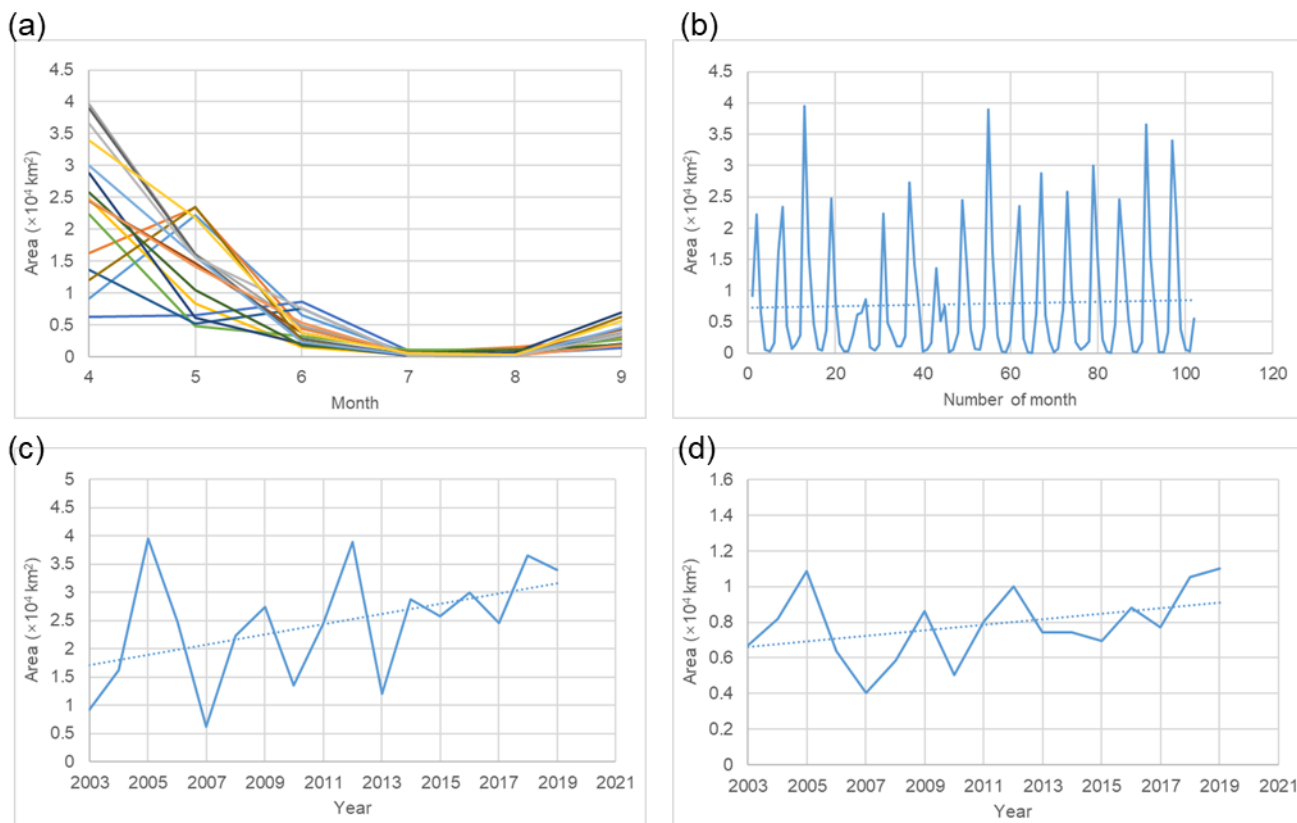

**Figure S1.** SCA during 2003-2019 in the source region of the YRB. (a) The intra-annual variation; (b) The monthly data. (c) The inter-annual variation (April). (d) The inter-annual variation (growing season average).

**S5 Annual WUE evolutions across the YRB**

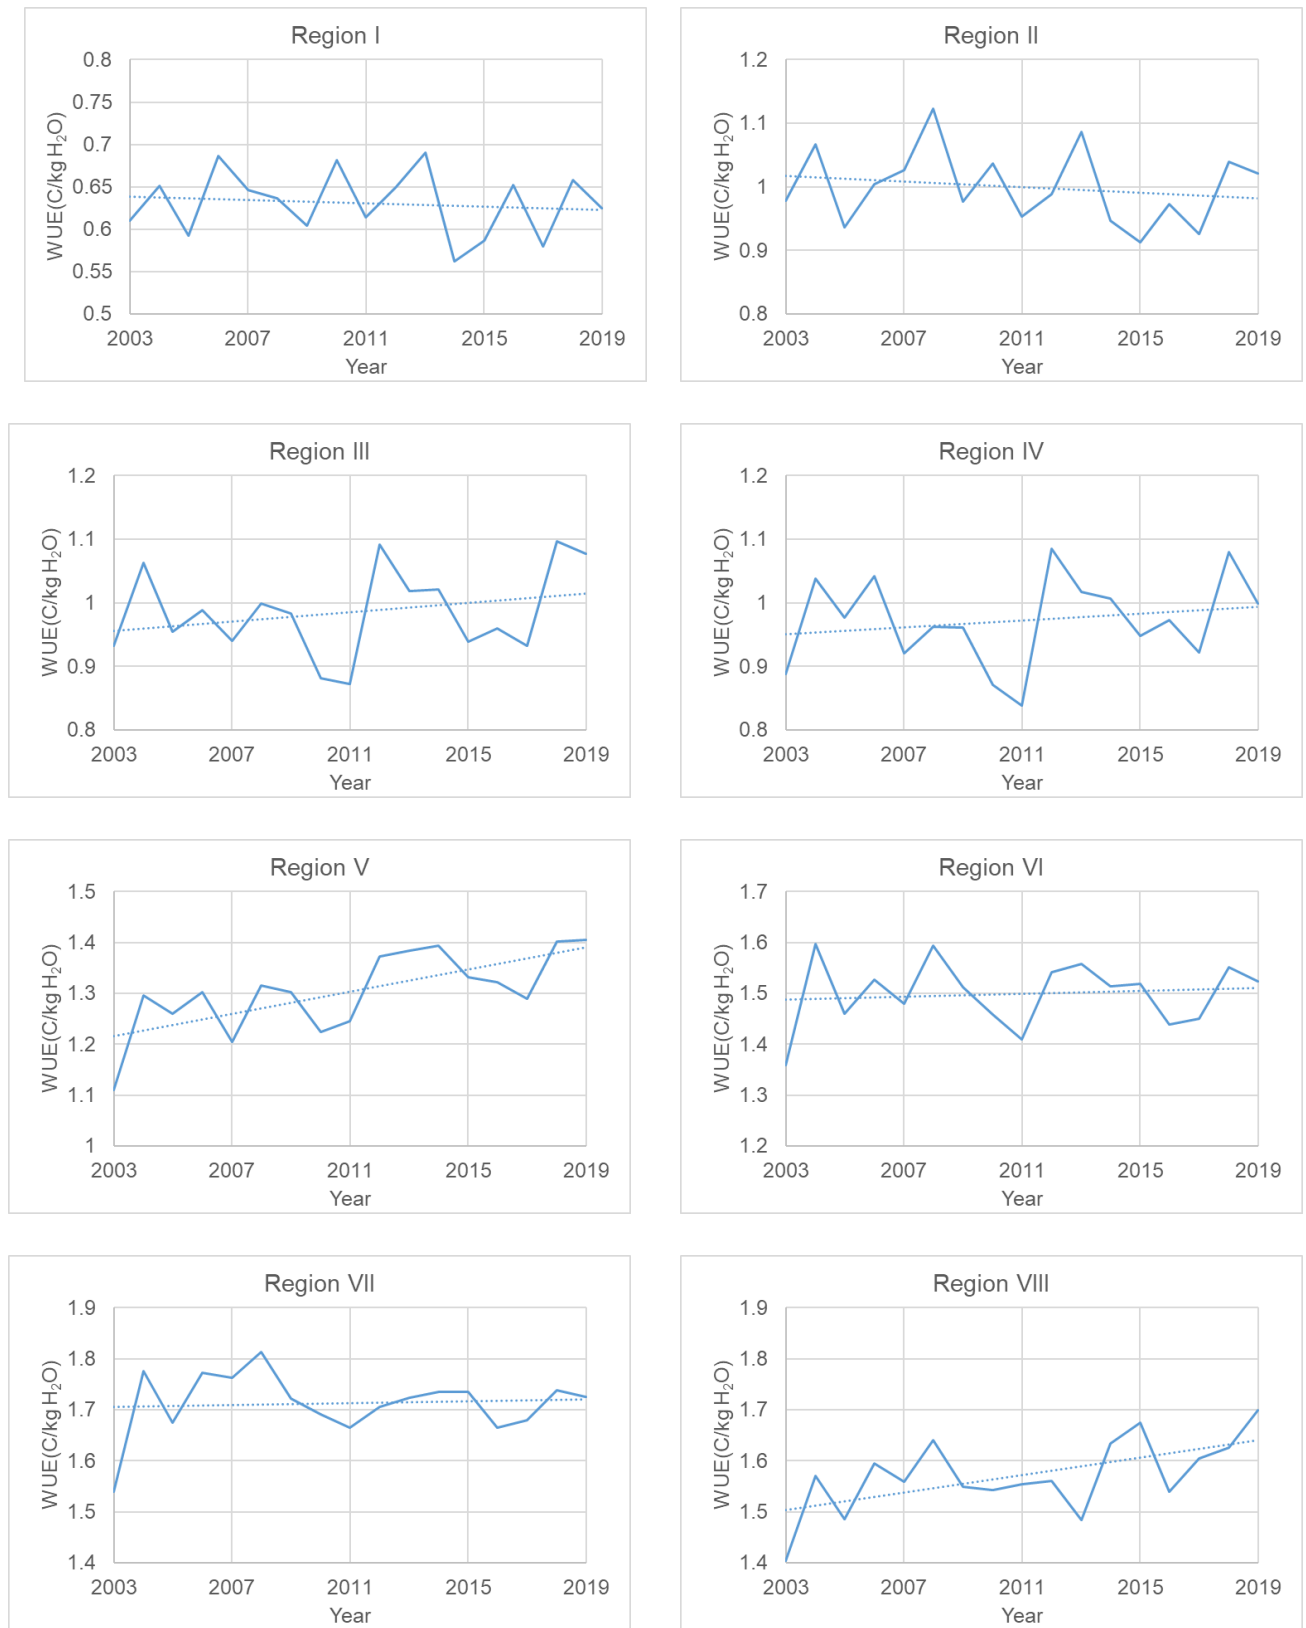

**Figure S2.** Annual WUE evolutions during 2003-2019 across the eight subregions of the YRB.

### S6 Evolutions of precipitation and temperature in Region I

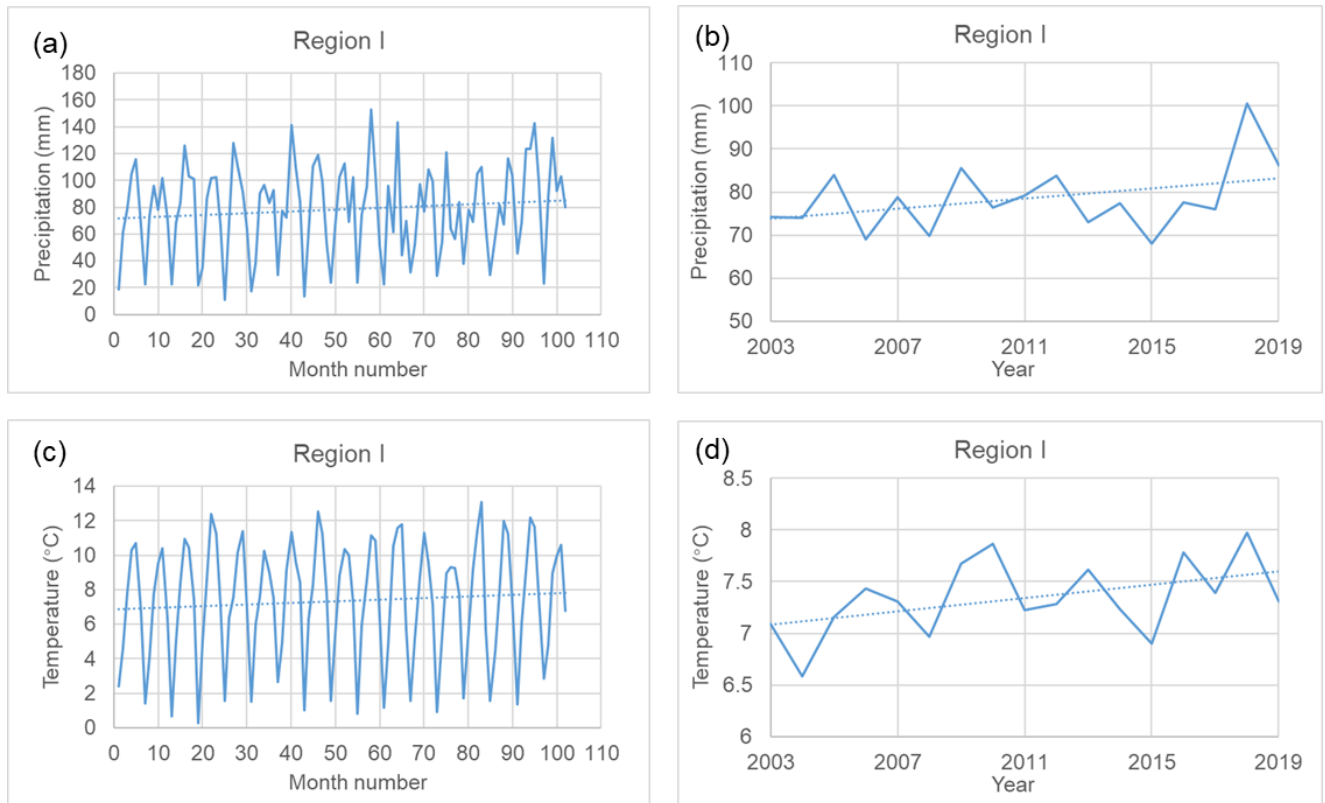

**Figure S3.** Evolutions of growing season precipitation and temperature in Region I.

### S7 Link strength of GPP versus ET to WUE

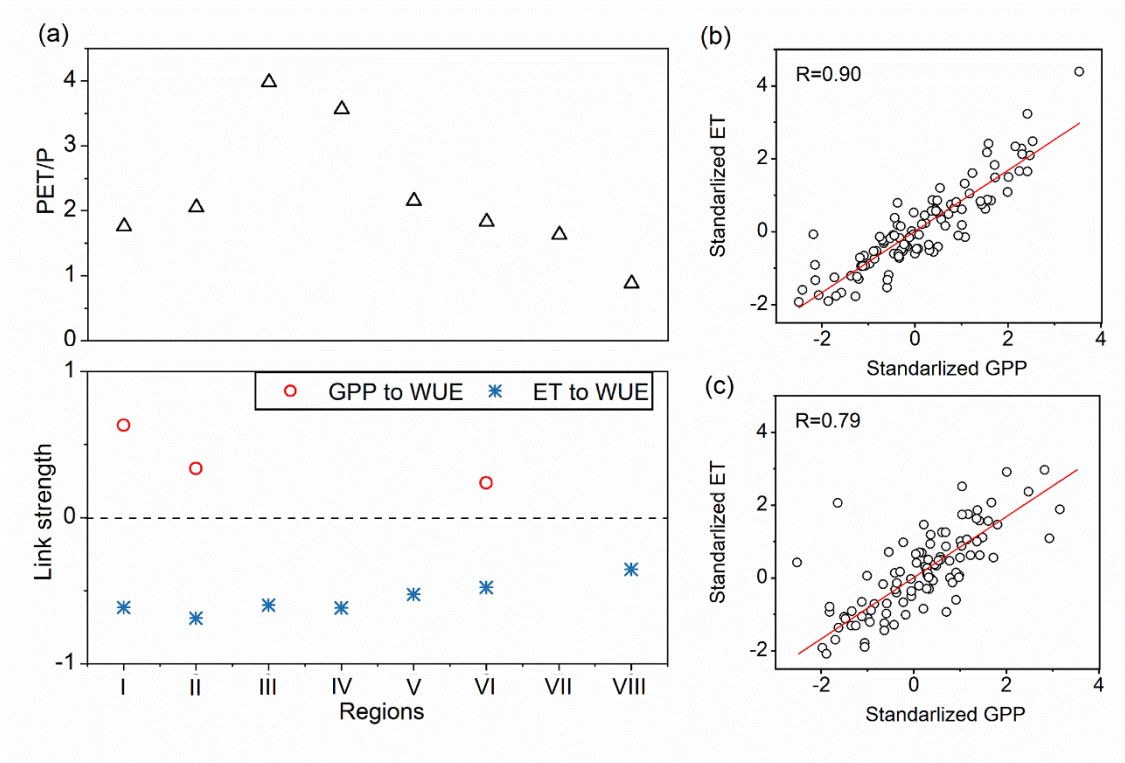

**Figure S4. (a)** Link strength of GPP versus ET to WUE in the eight subregions in the Yellow River basin. The top plot is the PET/P of each subregion, where the larger the value, the more arid the region. The figure only exhibits significant links. **(b)** Correlations of standardized ET versus GPP in Region VII. **(c)** Correlations of standardized ET versus GPP in Region VIII.
